# Supplementary material for: Introducing Lu-1, a Novel Lactobacillus jensenii Phage Abundant in the Urogenital Tract
Source: PLoS One. 2020 Jun 11;15(6):e0234159. doi: 10.1371/journal.pone.0234159 (PMC7289420; doi:10.1371/journal.pone.0234159)
Supplement: S4 Table — (XLSX) [file pone.0234159.s004.xlsx]

## Sheet: ST4
Strain #	Isolation Source	Positive PCR
9	Catheterized Urine
21	Catheterized Urine	Lu1.1,Lu1.2
121	Catheterized Urine	Lv1,Lu1.1Lu1.3
209	Catheterized Urine	Lu1.1,Lu1.2
314	Catheterized Urine	Lv1
449	Catheterized Urine	Lv1,Lu1.1,Lu1.2
482	Catheterized Urine	Lu1.2
534	Catheterized Urine
543	Catheterized Urine	Lu1.1
564	Catheterized Urine	Lv1,Lu1.1
732	Catheterized Urine	Lv1
737	Catheterized Urine	Lu1.3
744	Catheterized Urine	Lu1.3
754	Catheterized Urine	Lu1.2
804	Catheterized Urine	Lv1,Lu1.1,Lu1.2
826	Catheterized Urine	Lu1.1,Lu1.2
847	Catheterized Urine	Lu1.1
922	Catheterized Urine
951	Catheterized Urine	Lu1.1,Lu1.2
968	Catheterized Urine	Lu1.1,Lu1.2,Lu1.3
1015	Catheterized Urine	Lu1.1,Lu1.2
1020	Catheterized Urine	Lu1.1,Lu1.2
1036	Catheterized Urine	Lv1
1955	Catheterized Urine	Lu1.1,Lu1.2,Lu1.3
2066	Catheterized Urine
2960	Catheterized Urine
3266	Catheterized Urine
4021	Catheterized Urine
4248	Catheterized Urine
3466	Perineal Swab	Lu1.1,Lu1.2,Lu1.3
4262	Perineal Swab	Lu1.1,Lu1.2,Lu1.3
1086	Vaginal Swab
1126	Vaginal Swab
1487	Vaginal Swab	Lv1,Lu1.1,Lu1.2,Lu1.3
1663	Vaginal Swab
3451	Vaginal Swab	Lu1.2,Lu1.3
4250	Vaginal Swab	Lu1.1,Lu1.2
1132	Voided Urine
1243	Voided Urine
1404	Voided Urine	Lu1.1,Lu1.2
1517	Voided Urine	Lv1Lu1.2,
1574	Voided Urine	Lu1.1,Lu1.2
1584	Voided Urine	Lu1.1,Lu1.2
1729	Voided Urine	Lu1.1,Lu1.2
1805	Voided Urine	Lu1.1,Lu1.2
1854	Voided Urine	Lu1.1,Lu1.2
2313	Voided Urine	Lu1.2
2466	Voided Urine
2495	Voided Urine
2565	Voided Urine
3425	Voided Urine	Lu1.2
3478	Voided Urine	Lu1.1
3587	Voided Urine	Lu1.1
3697	Voided Urine	Lu1.1
3770	Voided Urine	Lv1,Lu1.1,Lu1.2
3944	Voided Urine
4275	Voided Urine	Lu1.1,Lu1.2
4525	Voided Urine
4616	Voided Urine	Lu1.1,Lu1.2
4850	Voided Urine
4975	Voided Urine	Lu1.1,Lu1.2
5068	Voided Urine
5327	Voided Urine	Lu1.1,Lu1.2
